# Supplementary material for: Dysbiosis and Implication of the Gut Microbiota in Diabetic Retinopathy
Source: Front Cell Infect Microbiol. 2021 Mar 19;11:646348. doi: 10.3389/fcimb.2021.646348 (PMC8017229; doi:10.3389/fcimb.2021.646348)
Supplement: Supplementary file 7 [file Table_4.xlsx]

## Sheet: Supplementary Table S4
Supplementary Table S4. Discriminative microbes at the family level in DM, DR, and HC groups.
Fmily level	HC		DM		DR		p-value (Kruskal-Wallis test)
	Mean	SD	Mean	SD	Mean	SD
Peptostreptococcaceae	5.953	6.918	1.364	2.419	1.704	2.573	2.302e-05
Clostridiaceae	2.437	3.626	0.863	2.997	2.359	9.766	0.001387
Streptococcaceae	1.531	4.498	2.031	2.531	0.9641	2.341	0.02974
Eggerthellaceae	2.054	2.112	0.804	1.19	1.172	1.419	0.01447
norank_o_Clostridia_UCG-014	1.573	2.272	0.1572	0.5151	0.7356	1.693	0.001376
Butyricicoccaceae	0.842	0.6551	0.5481	1.027	0.728	0.9404	0.04314
Erysipelotrichaceae	0.9978	1.173	0.4757	1.343	0.6403	1.036	0.03189
Oscillospiraceae	0.845	0.9962	0.2954	0.5282	0.9432	1.613	0.01762
Eubacterium_coprostanoligenes_group	1.064	2.01	0.175	0.4316	0.4078	0.7482	0.02483
Monoglobaceae	0.8786	1.172	0.3637	0.5367	0.3442	0.6691	0.008974
Christensenellaceae	0.4386	0.5022	0.2533	0.792	0.5085	1.279	0.01867
Acidaminococcaceae	0.1304	0.5561	0.06385	0.1667	0.6112	2.149	0.02976
Tannerellaceae	0.04574	0.1315	0.2391	0.692	0.1653	0.193	0.02751
Anaerovoracaceae	0.1699	0.3162	0.0489	0.06108	0.1905	0.2582	0.02219
Pasteurellaceae	0.05625	0.2111	0.1155	0.2407	0.00114	0.005701	0.00102
Leuconostocaceae	0.03205	0.05074	0.02699	0.08077	0.08906	0.2685	0.006034
Eubacteriaceae	0.001014	0.00254	0.0171	0.0449	0.07513	0.1786	0.008746
Desulfovibrionaceae	0.02851	0.06713	0.009122	0.02816	0.05524	0.1033	0.02816
Peptococcaceae	0.06765	0.2476	0.001267	0.006335	0.01685	0.05328	0.007625
UCG-010	0.02027	0.04239	0	0	0.03395	0.08704	0.00307
unclassified_o_Oscillospirales	0.0185	0.04164	0.009628	0.03393	0.02128	0.04179	0.008229
unclassified_c_Clostridia	0.02293	0.0362	0.005954	0.009516	0.008615	0.01512	0.03162
Muribaculaceae	0.0152	0.06691	0	0	0.01736	0.08418	0.02522
Defluviitaleaceae	0.003547	0.007042	0.0007601	0.003801	0.003294	0.007511	0.01516
unclassified_c_Bacilli	0	0	0.00152	0.004583	0	0	0.04588
Sphingomonadaceae	0	0	0	0	0.0003801	0.00105	0.04581
